# Supplementary material for: Improving healthcare student experience of clinical placements
Source: PubMed Central journal article supplement — BMJ Open Qual. 2024 Jan 4;13(1):e002504. doi: 10.1136/bmjoq-2023-002504 (PMC10773407; doi:10.1136/bmjoq-2023-002504), 2024-01-04
Supplement: bmjoq-2023-002504supp001.pdf [file bmjoq-2023-002504supp001.pdf]

**Full list of subthemes from interviews and literature review**

- **Belonging & acceptance**
  - Integration
  - Welcome & greeting rituals
  - Social participation
  - Duration of placement
  - Clinical teachers bridge gap between students and healthcare team
  - Recognition & respect
  - Culture of care
  - Lack of contact
  
- **Familiarity & continuity**
  - Place, staff & processes, procedures, paperwork
  - Orientation & adapting
  - Familiarity with trust improves transition
  
- **Confidence & competence**
  - Doubting their knowledge and skills
    - Reassurance that doubt is normal part of nursing practice
    - Acknowledging progress through incremental feedback
  - Experiencing “real world” nursing practice & shifts
  - Returning to same placement increases confidence
  - Balancing patient care with student experience
  - Patient compliments
  - Reflection (either in action – as events unfold, or on action (in retrospect))
    - Students must alternate between, sometimes in quick succession
    - Set boundaries where necessary
  - Reasoning
    - Deduction (testing existing theory / hypothesis)
    - Induction (theory / hypothesis developed in practice)
    - Students can be unsure of which form of reasoning to apply
  - Risk is a natural factor in clinical decision making
    - Real-time reasoning (concise & clear)
    - Incremental reasoning (identify & describe clinical conditions and speculate)
    - Partnership working (with patients)
    - Liaising with other healthcare professionals (multidisciplinary collaboration & referral)
  
- **Preparation & preparedness**
  - Stepping back and allowing students to take lead & responsibility
  - Understanding placement learning objectives
  - Understanding student developmental needs
  - Ensure students and RNs have these before placement:
    - Resources required to develop clear understanding of required learning outcomes
    - Assessment documentation
    - Reporting processes
  - Structured information package (digital format)
    - Developed and evaluated in collaboration with practitioners
    - Preparatory reading
    - Transport links

- Contact details
  - Shift times & breaks
  - Catering facilities
  - Managing external factors such as shopping, laundry and submission of assignments
- **Supervision & support**
    - Understanding students' learning needs & motivations and work constructively with them
    - Individualised to student
    - Role & expectations ambiguity / contrast between different professionals
    - Staff workload demands
    - RN teaching and assessment training
    - RN role recognition
    - RN support (including delegated workloads)
    - Mutual trust
    - Safe environment to ask questions
    - Talk to for clarification
    - Feedback on student clinical skills and professional skills
    - Senior mentors more effective despite having less time
    - Reasonable adjustments for:
      - Dyslexia
      - Dyscalculia (intellectual disabilities)
      - Mental health issues (incl. anxiety, stress and depression)
      - Long-term health conditions
      - Traumatic experiences while on placement
    - More support for second year students
    - Peer support / buddy schemes
  - **Feeling overwhelmed / stress / impact on social & emotional health**
    - Juggling multiple competing demands on physical capabilities, personal resources, income and time
    - External factors (I.e. childcare, caring for relatives etc)
      - Guilt
    - Financial struggles
    - Workplace violence / bullying
    - Poor nursing competency / organisation (feeling incompetent)
    - Strained relationship with assessor
    - Heavy workload
      - Shifts with multiple admissions and discharges / multiple critical events
    - Short staffing
    - Lack of access to experienced nurses / physicians while on night shifts
    - Busy schedule
    - Long shifts alongside personal and financial responsibilities
    - Little time for other social activities
    - Prioritisation of work over friends and family
    - Self care
    - Resilience
    - Experiencing multiple transitions & learning environments:
      - Move to university
      - Many and various placements

- Travelling to and between placements
- Ways of coping
  - Becoming a registered nurse
  - Mindfulness
  - Physical exercise
  - Rest & sleep
  - Diet
  - Minor adjustments to routines
  - Social networks with people of similar outlooks and interests
